# Supplementary material
Source: PubMed Central journal article supplement (PMC7457145)
Supplement: NIHMS1611696-supplement-Supplemental_table_1.pdf [file NIHMS1611696-supplement-Supplemental_table_1.pdf]

Supplement Table 1. Differentially up-regulated genes (>1.5-fold differences; P < 0.05) from mammary tumors of the PyMT transgenic mice exposed to zebularine for 13 days.

| Zeb1/C1 Ratio | GB Accession | GeneCards     | Zeb1/C1 Ratio | GB Accession | GeneCards     | Zeb1/C1 Ratio | GB Accession | GeneCards     |
|---------------|--------------|---------------|---------------|--------------|---------------|---------------|--------------|---------------|
| 45.1          | AF223417     | Trdn          | 2.2           | AI553394     | Usp2          | 1.7           | BB333759     | E430036I04Rik |
| 13.9          | AV005759     | Cox6a2        | 2.1           | AF143543     | Dtna          | 1.6           | BE200030     | 2010001M06Rik |
| 11.7          | AV012778     | 1110001P11Rik | 2.1           | BG141806     | Rpl27a        | 1.6           | BB091321     | 9430029L20Rik |
| 10.0          | AV241307     | Myom2         | 2.0           | AV290622     |               | 1.6           | U96752       | H2-Q1         |
| 8.7           | BM122177     | 2310036G12Rik | 2.0           | AK009753     | Fmo2          | 1.6           | BB279158     | 2310028N02Rik |
| 8.0           | AK010167     | Tcap          | 2.0           | BB028312     | Fdft1         | 1.6           | AI561743     | BC004004      |
| 7.7           | BC025172     | Mb            | 2.0           | NM_009835    | Ccr6          | 1.6           | NM_013550    | Hist1h4h      |
| 7.4           | AI595938     | AI595938      | 2.0           | BB741897     | 2510004L01Rik | 1.6           | BM249597     | Klf12         |
| 6.4           | AJ002522     | Myh1          | 2.0           | L36663       | Hnrpab        | 1.6           | NM_009554    | Zfp37         |
| 6.4           | NM_011620    | Tnnt3         | 2.0           | AV323441     | Maf           | 1.6           | BB486599     | Siat8f        |
| 6.4           | NM_013467    | Aldh1a7       | 2.0           | AV066512     | 2010109N14Rik | 1.6           | AI315333     | 2810410D24Rik |
| 6.2           | M63244       | Alas2         | 2.0           | NM_023462    | Rbp7          | 1.6           | NM_016673    | Cntfr         |
| 6.2           | NM_009405    | Tnni2         | 1.9           | AK011116     | Hba-a1        | 1.6           | BB148302     | AW320017      |
| 6.0           | AJ293626     | Myh1          | 1.9           | BB433324     | Ncald         | 1.6           | NM_019738    | Nupr1         |
| 5.9           | AI324124     | Snca          | 1.8           | AI647687     | Dpep1         | 1.6           | BG065754     | Ccng1         |
| 5.9           | NM_013645    | Pva           | 1.9           | AK006146     | B230207H15Rik | 1.6           | BC022751     | Isg20         |
| 5.9           | NM_016754    | Mylpf         | 1.9           | BB264725     | 1200006M05Rik | 1.6           | AF035830     | Per2          |
| 5.7           | NM_007504    | Atp2a1        | 1.9           | BB106834     | AI173486      | 1.6           | BB131341     | Rad51h3       |
| 5.6           | AJ278733     | Myh4          | 1.9           | BB234363     | A630048M13    | 1.6           | AV337847     | Rnf103        |
| 5.6           | AI326984     | Mybpc2        | 1.9           | NM_011579    | Tgtp          | 1.6           | NM_025797    | Cyb5          |
| 5.4           | NM_007710    | Ckm           | 1.9           | BC019591     |               | 1.6           | BI413218     | Acsf1         |
| 5.4           | NM_007933    | Eno3          | 1.9           | AV005520     | Sh3glb1       | 1.6           | BC026410     | AI427122      |
| 5.2           | NM_021391    | Ppp1r1a       | 1.9           | NM_023220    | 2010106G01Rik | 1.6           | AK002555     | Acaa2         |
| 5.1           | NM_009943    | Cox6a2        | 1.8           | AB062282     | Mtac2d1       | 1.6           | AW553537     |               |
| 5.1           | BM212838     | 1110056A04Rik | 1.8           | BB027219     | AI841875      | 1.6           | AV234069     | AI046348      |
| 5.0           | AV007148     | Tnni2         | 1.8           | AK017634     | 1810014B01Rik | 1.6           | AV158652     | 3110021A11Rik |
| 4.9           | AA419994     | Zfp145        | 1.8           | BF537798     | Ramp2         | 1.6           | AV310588     | Ccnd2         |
| 4.6           | AB022340     | Sah           | 1.8           | BC020004     | Gprc5b        | 1.6           | NM_015786    | Hist1h1c      |
| 4.4           | BQ174973     |               | 1.8           | BM120569     | A830037N07Rik | 1.6           | BE949498     | Psmc11        |
| 4.3           | AK003186     | Tpm2          | 1.8           | C80355       | Serhl         | 1.6           | BB745314     | Msi2          |
| 4.3           | NM_008218    | Hba-a1        | 1.8           | BB257077     | Arid5b        | 1.6           | BB160479     | Vdac1         |
| 4.3           | AF030636     | Cxcl13        | 1.8           | BB211471     | Cryz11        | 1.6           | NM_019738    | Nupr1         |
| 4.0           | AI467657     | AI467657      | 1.8           | AW554652     | Diap1         | 1.6           | BG277020     | 5730406M06Rik |
| 3.8           | AK003566     | Asb2          | 1.8           | BG064045     | G430055L02Rik | 1.6           | BG070926     | C130015C19    |
| 3.8           | AB054000     | 1110028A07Rik | 1.8           | AI848909     | Hist3h2a      | 1.6           | BB250384     | Vcam1         |
| 3.8           | BB336256     |               | 1.7           | BC019757     | Hist1h4i      | 1.5           | AK019501     | 4632418H02Rik |
| 3.6           | AK003906     | Itgb1bp2      | 1.7           | BG076005     |               | 1.5           | AK009941     | 2310022A10Rik |
| 3.6           | AV016515     | Cryab         | 1.7           | BC026655     | 2310045A20Rik | 1.5           | BB477613     | E030034P13Rik |
| 3.4           | AK010212     | Pkia          | 1.7           | BI684556     | Smc2l1        | 1.5           | AK007017     | 181006J02Rik  |
| 3.4           | BE993937     | Scn4b         | 1.7           | AW106975     | 2610041P16Rik | 1.5           | BI664973     | C330018D20Rik |
| 3.3           | BG797099     | Ddit4l        | 1.7           | BM899344     | Sycp3         | 1.5           | BF020847     | 1810049H20Rik |
| 3.1           | BQ176864     | Ppp1r3c       | 1.7           | NM_133242    | Rnpc2         | 1.5           | BB251396     |               |
| 3.0           | BC024358     | Tpm2          | 1.7           | AW910425     | Phf3          | 1.5           | BC004057     | Tacc2         |
| 2.9           | BB520487     | 2900002H16Rik | 1.7           | NM_007863    | Mpp3          | 1.5           | BB414224     | Tmprss2       |
| 2.8           | AA210377     | Clic5         | 1.7           | AV278924     |               | 1.5           | BB125647     | 2010305K11Rik |
| 2.8           | AK011116     | Hba-a1        | 1.7           | BC027056     | Mapre2        | 1.5           | BM207017     | Plcl2         |
| 2.8           | NM_021883    | Tmod1         | 1.7           | L35549       | Cd151         | 1.5           | BB812465     | Styx          |
| 2.7           | BB193413     | Aqp4          | 1.7           | AW107826     | Zfp85-rs1     | 1.5           | C88147       | Nup153        |
| 2.7           | U89924       | Ppp1r3c       | 1.7           | BM211317     | 4833415E20Rik | 1.5           | BB045561     | AI225934      |
| 2.7           | NM_009349    | Temt          | 1.7           | BB533903     | Hist1h1c      | 1.5           | BG069906     |               |
| 2.6           | AI315015     | Ces3          | 1.7           | AV282911     | Pfkfb3        | 1.5           | NM_008595    | Mfng          |
| 2.5           | NM_054085    | AW319487      | 1.7           | BB531351     | E030016H06Rik | 1.5           | AJ276707     | Wtap          |
| 2.5           | AI467657     | AI467657      | 1.7           | NM_025370    | 1110018J18Rik | 1.5           | BB662083     |               |
| 2.5           | BC014728     | 1110001E17Rik | 1.7           | BC005602     | 9130013K24Rik | 1.5           | BC017161     | Dnajb4        |
| 2.4           | AI639807     | 2510038N07Rik | 1.7           | AK015136     | 4932415G12Rik | 1.5           | BC025941     | AW547365      |
| 2.4           | BB132493     | 2510004L01Rik | 1.7           | AK018202     | 2310043N10Rik | 1.5           | AI503516     |               |
| 2.4           | BB480432     |               | 1.7           | BB210729     | Mr1           | 1.5           | BC019525     | Noxo1         |
| 2.4           | BG797172     | Vgll2         | 1.7           | AV153660     | 2900056M20Rik | 1.5           | NM_023697    | Rdh14         |
| 2.4           | NM_008288    | Hsd11b1       | 1.7           | BF227641     | Nfatc4        | 1.5           | BB366565     | Cecr2         |
| 2.3           | NM_053200    | Ces3          | 1.7           | BB752393     | A830037N07Rik | 1.5           | BM234069     |               |
| 2.3           | BG797614     |               | 1.7           | BB271764     | A830058L05    | 1.5           | BF022571     | 5330411L03Rik |
| 2.3           | BC023105     | BC023105      | 1.7           | BB473987     |               | 1.5           | BB308836     | Ppm1l         |
| 2.3           | Z30939       | Hist1h3d      |               |              |               | 1.5           | BC021484     | Sspn          |
| 2.3           | BC027434     | Hbb-b1        |               |              |               | 1.5           | BB753447     | 2700063E05Rik |
| 2.2           | BB549292     | Maob          |               |              |               | 1.5           | BM213832     |               |
