# Supplementary material
Source: PubMed Central journal article supplement (PMC7457145)
Supplement: NIHMS1611696-supplement-Supplemental_table_2.pdf [file NIHMS1611696-supplement-Supplemental_table_2.pdf]

Supplement Table 2. Differentially down-regulated genes (>1.5-fold differences; P < 0.05) from mammary tumors of the PyMT transgenic mice exposed to zebularine for 13 days.

| Zeb1/C1 Ratio | GB Accession | GeneCards     | Zeb1/C1 Ratio | GB Accession | GeneCards     | Zeb1/C1 Ratio | GB Accession | GeneCards     |
|---------------|--------------|---------------|---------------|--------------|---------------|---------------|--------------|---------------|
| 0.4           | BB147678     | Duox2         | 0.6           | BF468377     | Vps52         | 0.6           | BM118398     |               |
| 0.5           | AF022992     | Per1          | 0.6           | BI646094     | Sntb2         | 0.6           | NM_009054    | Trim27        |
| 0.5           | BC005738     | Lcn7          | 0.6           | BB494559     |               | 0.6           | NM_008056    | Fzd6          |
| 0.5           | AK005776     | 5430432M24Rik | 0.6           | BB004060     | Axin          | 0.6           | BB452429     | BC025575      |
| 0.5           | NM_009996    | Cyp24a1       | 0.6           | NM_009870    | Cdk4          | 0.6           | BC027438     | Gale          |
| 0.5           | BB479526     |               | 0.6           | AW125726     | Zmynd19       | 0.6           | NM_134011    | Tbrg4         |
| 0.5           | NM_010783    | Mdfi          | 0.6           | NM_011125    | Pltp          | 0.6           | BC019755     | BC019755      |
| 0.5           | NM_009682    | Ap3s2         | 0.6           | NM_008566    | Mcm5          | 0.6           | BC003209     | C77668        |
| 0.5           | BC024684     | Mapk6         | 0.6           | AW987375     | Ptpn21        | 0.6           | BB702754     | Uhrf1         |
| 0.5           | BG073405     | AA673488      | 0.6           | BB760945     | Zfp128        | 0.6           | AK011392     | 2610014H22Rik |
| 0.5           | U60330       | Psme3         | 0.6           | AK008037     | Foxm1         | 0.6           | BB453531     | Erf           |
| 0.5           | AW553781     | Evl           | 0.6           | AK010453     | Cad           | 0.6           | BM204396     | Spata2        |
| 0.5           | NM_008116    | Ggt1          | 0.6           | NM_033354    | Rgpr          | 0.6           | BC021856     | Nol6          |
| 0.5           | BQ175876     | R75022        | 0.6           | NM_133865    | Dclre1b       | 0.6           | BC007472     | Ptbp1         |
| 0.5           | AW456056     | B930096F20Rik | 0.6           | NM_009423    | Traf4         | 0.6           | AK014353     | Khdrbs3       |
| 0.5           | NM_008486    | Anpep         | 0.6           | BB745401     | 1810049K24Rik | 0.6           | NM_009652    | Akt1          |
| 0.5           | NM_133693    | 3100004P22Rik | 0.6           | AW990386     | Zfp513        | 0.6           | BF160651     | Smyd5         |
| 0.5           | BI156044     | C1qtnf1       | 0.6           | BC024519     | 2210413P12Rik | 0.6           | BB031756     | Sf3a1         |
| 0.5           | AV110584     | Mlp           | 0.6           | BC014860     | Dgkz          | 0.6           | BC015289     | Vasp          |
| 0.5           | BM232515     | Pa2g4         | 0.6           | AK011183     | Chd3          | 0.6           | NM_019573    | Wwox          |
| 0.5           | BG072084     | A830039B04Rik | 0.6           | NM_026551    | 6720485C15Rik | 0.6           | NM_023223    | Cdc20         |
| 0.5           | NM_011314    | Saa2          | 0.6           | BC003427     | Kif22         | 0.6           | AW546141     | Marcks        |
| 0.5           | AK010751     | Mark4         | 0.6           | BQ175287     |               | 0.6           | NM_008404    | Itgb2         |
| 0.5           | AK019427     | Bat2          | 0.6           | BG868949     | 2810410A03Rik | 0.6           | AU018180     | AI481316      |
| 0.5           | AV288264     | Pelo          | 0.6           | BB822856     | Pip5k1b       | 0.6           | BB794873     | G431004K08Rik |
| 0.5           | BB828014     | Trp53         | 0.6           | AI504908     | AL024069      | 0.6           | U37500       | Polr2a        |
| 0.5           | NM_010791    | Meox1         | 0.6           | BB766878     | Col16a1       | 0.6           | BE311335     | 4930438M06Rik |
| 0.5           | W91617       | Rkhd1         | 0.6           | NM_013832    | Rasal1        | 0.6           | BC019178     | BC031407      |
| 0.5           | NM_010679    | Lalba         | 0.6           | BF302166     | Gna12         | 0.6           | BM213850     | Nolc1         |
| 0.5           | NM_007615    | Catns         | 0.6           | BB314594     | Qars          | 0.7           | BC013777     | Snrpa1        |
| 0.6           | BB534457     | AU024026      | 0.6           | AF011450     | Col15a1       | 0.7           | BB111712     | D630040G17Rik |
| 0.6           | BF138887     | Rad23b        | 0.6           | AK010254     | 2400002F02Rik | 0.7           | NM_023118    | Dab2          |
| 0.6           | BC027283     | 1190003K14Rik | 0.6           | BM222431     |               | 0.7           | BB209183     | Cdc25c        |
| 0.6           | NM_013545    | Hcph          | 0.6           | BC021352     | Plod2         | 0.7           | AK017680     | Spred1        |
| 0.6           | BE910952     | AI646023      | 0.6           | AV226010     | Tmc5          | 0.7           | NM_010368    | Gus           |
| 0.6           | BM222403     | Shmt2         | 0.6           | BC019480     | 1110032N12Rik | 0.7           | NM_008894    | Pold2         |
| 0.6           | AW536415     | Stx3          | 0.6           | BG063049     | Mllt1         | 0.7           | BE134381     | Srr1          |
| 0.6           | AV121839     | Sbf1          | 0.6           | BI156583     | Trim46        | 0.7           | BC005475     | Prc1          |
| 0.6           | BG243624     | Maz           | 0.6           | AK004157     | Atp6v1c2      | 0.7           | BC021490     | Dapk1         |
| 0.6           | AF196476     | Slc20a2       | 0.6           | NM_013782    | Ptdss2        | 0.7           | NM_009870    | Cdk4          |
| 0.6           | AA833146     | Ptgs1         | 0.6           | U21050       | Traf3         | 0.7           | NM_022811    | Paf53         |
| 0.6           | NM_012006    | Cte1          | 0.6           | BG063077     | Fntb          | 0.7           | BQ085677     | 1110029E03Rik |
| 0.6           | BB043576     |               | 0.6           | AF087680     | Vars2         | 0.7           | NM_011588    | Trim28        |
| 0.6           | NM_007523    | Bak1          | 0.6           | NM_023564    | Plscr3        | 0.7           | AK011521     | Hnrpm         |
| 0.6           | NM_011657    | Tulp3         | 0.6           | AV307393     | Pmf1          | 0.7           | BC007151     | Nol1          |
| 0.6           | NM_023627    | Isyna1        | 0.6           | BC023427     | Pdgfb         | 0.7           | BC025048     | Dusp7         |
| 0.6           | AI462015     | Nfkbia        | 0.6           | BC011374     | Lrp5          | 0.7           | BG871810     | Vamp2         |
| 0.6           | BG069908     |               | 0.6           | BM220305     | Purb          | 0.7           | BM218630     | Pcdh18        |
| 0.6           | BQ177191     | 6230400G14Rik | 0.6           | AK011781     | Acbd6         | 0.7           | NM_133707    | 1810019J16Rik |
| 0.6           | AF477481     | Ris2          | 0.6           | BQ175059     | AI854770      | 0.7           | U75214       | Slc1a1        |
| 0.6           | C85322       | 1200010C09Rik | 0.6           | NM_019869    | Rbm14         | 0.7           | NM_020004    | Gcn5l2        |
| 0.6           | BB795585     | Ntrk2         | 0.6           | BB522516     | Maml1         | 0.7           | M94335       | Akt1          |
| 0.6           | BB464198     | A930009E05Rik | 0.6           | AW542735     | Slc30a2       | 0.7           | BG075800     | St6gal1       |
| 0.6           | BB765292     | Eif4ebp2      | 0.6           | NM_011252    | RbmX          | 0.7           | BB042564     | 2610507L03Rik |
| 0.6           | NM_007740    | Col9a1        | 0.6           | BC023107     | 5830457O10Rik | 0.7           | NM_009389    | Tle3          |
| 0.6           | NM_053074    | Nup62         | 0.6           | AV230461     |               | 0.7           | BG072367     | Brd3          |
| 0.6           | AI481951     | Cnot3         | 0.6           | BB329489     | Serpinh1      | 0.7           | NM_008922    | Prim2         |
| 0.6           | BM120583     | E430019H13Rik | 0.6           | AK020374     | Tnfrsf11a     | 0.7           | AK016709     | Rnf134        |
| 0.6           | AV305132     | Zdhhc6        | 0.6           | AK004608     | Hspa8         | 0.7           | BI788645     | Sdc1          |
| 0.6           | NM_033601    | Bcl3          | 0.6           | AF244347     | Adprh         | 0.7           | BC023083     | Ssb4          |
| 0.6           | NM_134134    | A630042L21Rik | 0.6           | BB811943     | 2410004H02Rik | 0.7           | AA030209     | Rps17         |
| 0.6           | NM_023805    | Slc38a3       | 0.6           | BB230053     | BC023823      | 0.7           | BC024503     | D7ErtD156e    |
|               |              |               |               |              |               | 0.7           | BI658327     | Mcm3          |
|               |              |               |               |              |               | 0.7           | BC012692     | Akr1e1        |
