# Supplementary material
Source: PubMed Central journal article supplement (PMC7457145)
Supplement: NIHMS1611696-supplement-Supplemental_table_3.pdf [file NIHMS1611696-supplement-Supplemental_table_3.pdf]

Supplement Table 3. Differentially up-regulated genes (>1.5-fold differences; P < 0.05) from mammary tumors of the PyMT transgenic mice exposed to zebularine for 23 days.

| Zeb1/C1 Ratio | GB Accession              | GeneCards                     | Zeb1/C1 Ratio | GB Accession              | GeneCards                     |
|---------------|---------------------------|-------------------------------|---------------|---------------------------|-------------------------------|
| 8.47          | <a href="#">NM_133862</a> | <a href="#">Fgg</a>           | 1.67          | <a href="#">AK012475</a>  | <a href="#">A730011F23Rik</a> |
| 5.11          | <a href="#">NM_009114</a> | <a href="#">S100a9</a>        | 1.67          | <a href="#">AK019115</a>  | <a href="#">2410039E07Rik</a> |
| 6.20          | <a href="#">M63244</a>    | <a href="#">Alas2</a>         | 1.66          | <a href="#">BB091321</a>  | <a href="#">9430029L20Rik</a> |
| 3.36          | <a href="#">BG297038</a>  | <a href="#">1300007C21Rik</a> | 1.65          | <a href="#">AV316469</a>  | <a href="#">5830436I19Rik</a> |
| 4.28          | <a href="#">NM_008218</a> | <a href="#">Hba-a1</a>        | 1.65          | <a href="#">AV265561</a>  | <a href="#">Mospd4</a>        |
| 2.79          | <a href="#">AK011116</a>  | <a href="#">Hba-a1</a>        | 1.65          | <a href="#">U31510</a>    | <a href="#">Art1</a>          |
| 2.66          | <a href="#">AI156158</a>  | <a href="#">Des</a>           | 1.65          | <a href="#">AV016515</a>  | <a href="#">Cryab</a>         |
| 2.61          | <a href="#">NM_013743</a> | <a href="#">Pdk4</a>          | 1.65          | <a href="#">AV282911</a>  | <a href="#">Pfkfb3</a>        |
| 2.53          | <a href="#">NM_029569</a> | <a href="#">Asb5</a>          | 1.62          | <a href="#">NM_013867</a> | <a href="#">Bcar3</a>         |
| 2.37          | <a href="#">AV169424</a>  | <a href="#">1500004O14Rik</a> | 1.62          | <a href="#">BF136544</a>  | <a href="#">Fgl2</a>          |
| 2.35          | <a href="#">BG095529</a>  | <a href="#">Becn1</a>         | 1.61          | <a href="#">AJ245857</a>  | <a href="#">Car9</a>          |
| 2.29          | <a href="#">AI594683</a>  | <a href="#">Dmn</a>           | 1.61          | <a href="#">AF199491</a>  | <a href="#">Ccrn4l</a>        |
| 2.27          | <a href="#">BC027434</a>  | <a href="#">Hbb-b1</a>        | 1.61          | <a href="#">BB378796</a>  | <a href="#">2310046G15Rik</a> |
| 2.25          | <a href="#">AF065933</a>  | <a href="#">Ccl2</a>          | 1.60          | <a href="#">C86813</a>    |                               |
| 2.24          | <a href="#">NM_009398</a> | <a href="#">Tnfaip6</a>       | 1.60          | <a href="#">BB426294</a>  | <a href="#">Synpo</a>         |
| 2.23          | <a href="#">BC010605</a>  |                               | 1.59          | <a href="#">NM_033601</a> | <a href="#">Bcl3</a>          |
| 2.22          | <a href="#">NM_008176</a> | <a href="#">Cxcl1</a>         | 1.59          | <a href="#">BC021616</a>  | <a href="#">Ndufs8</a>        |
| 2.20          | <a href="#">C76423</a>    |                               | 1.59          | <a href="#">BI320076</a>  |                               |
| 2.20          | <a href="#">NM_007906</a> | <a href="#">Eef1a2</a>        | 1.59          | <a href="#">AW324354</a>  | <a href="#">4930595O22Rik</a> |
| 2.19          | <a href="#">NM_021400</a> | <a href="#">Prg4</a>          | 1.59          | <a href="#">NM_016685</a> | <a href="#">Comp</a>          |
| 2.18          | <a href="#">BG862223</a>  |                               | 1.59          | <a href="#">BG797099</a>  | <a href="#">Ddit4l</a>        |
| 2.12          | <a href="#">NM_008871</a> | <a href="#">Serpine1</a>      | 1.58          | <a href="#">BC006820</a>  | <a href="#">2310066E14Rik</a> |
| 2.09          | <a href="#">BC015270</a>  | <a href="#">Hist2h3c2</a>     | 1.57          | <a href="#">NM_010591</a> | <a href="#">Jun</a>           |
| 2.07          | <a href="#">BC005679</a>  | <a href="#">Sdc4</a>          | 1.57          | <a href="#">AK012006</a>  | <a href="#">2610307O08Rik</a> |
| 2.05          | <a href="#">NM_009694</a> | <a href="#">Apobec2</a>       | 1.56          | <a href="#">AV230647</a>  |                               |
| 2.04          | <a href="#">NM_007609</a> | <a href="#">Casp4</a>         | 1.56          | <a href="#">BB559067</a>  | <a href="#">Prss11</a>        |
| 2.03          | <a href="#">AI595920</a>  | <a href="#">1110020B03Rik</a> | 1.56          | <a href="#">BB763642</a>  |                               |
| 1.97          | <a href="#">AW495288</a>  |                               | 1.56          | <a href="#">M94967</a>    | <a href="#">Ptgs2</a>         |
| 1.94          | <a href="#">AF128193</a>  | <a href="#">Ccl7</a>          | 1.56          | <a href="#">NM_009949</a> | <a href="#">Cpt2</a>          |
| 1.92          | <a href="#">BG065773</a>  | <a href="#">C76872</a>        | 1.55          | <a href="#">AV229143</a>  | <a href="#">lfi202b</a>       |
| 1.91          | <a href="#">BC025219</a>  | <a href="#">Sfrs8</a>         | 1.55          | <a href="#">D14636</a>    | <a href="#">Runx2</a>         |
| 1.88          | <a href="#">BC024358</a>  | <a href="#">Tpm2</a>          | 1.55          | <a href="#">BC002036</a>  | <a href="#">Tpd52</a>         |
| 1.81          | <a href="#">AW763765</a>  | <a href="#">Hspa1a</a>        | 1.55          | <a href="#">NM_011082</a> | <a href="#">Pigr</a>          |
| 1.79          | <a href="#">BM239721</a>  | <a href="#">BC019206</a>      | 1.54          | <a href="#">AV238225</a>  | <a href="#">Lmna</a>          |
| 1.78          | <a href="#">AV359819</a>  | <a href="#">Jag1</a>          | 1.54          | <a href="#">AA880220</a>  | <a href="#">Jag1</a>          |
| 1.77          | <a href="#">BB528408</a>  | <a href="#">Mrc2</a>          | 1.54          | <a href="#">D67017</a>    | <a href="#">Hsp105</a>        |
| 1.76          | <a href="#">NM_007393</a> | <a href="#">Actb</a>          | 1.54          | <a href="#">AV288135</a>  | <a href="#">BC022765</a>      |
| 1.76          | <a href="#">AK007630</a>  | <a href="#">Cdkn1a</a>        | 1.54          | <a href="#">C77390</a>    | <a href="#">Xbp1</a>          |
| 1.75          | <a href="#">NM_023123</a> | <a href="#">H19</a>           | 1.54          | <a href="#">BB364488</a>  | <a href="#">1110048B16Rik</a> |
| 1.75          | <a href="#">AV027632</a>  | <a href="#">Pigr</a>          | 1.53          | <a href="#">BB824091</a>  |                               |
| 1.72          | <a href="#">BB831725</a>  | <a href="#">Socs3</a>         | 1.53          | <a href="#">BE691662</a>  |                               |
| 1.72          | <a href="#">BG141806</a>  | <a href="#">Rpl27a</a>        | 1.53          | <a href="#">C86813</a>    |                               |
| 1.72          | <a href="#">AK011116</a>  | <a href="#">Hba-a1</a>        | 1.52          | <a href="#">BM202770</a>  | <a href="#">Cyr61</a>         |
| 1.72          | <a href="#">BI499987</a>  |                               | 1.52          | <a href="#">NM_019417</a> | <a href="#">Pdlim4</a>        |
| 1.70          | <a href="#">NM_030561</a> | <a href="#">BC004004</a>      | 1.52          | <a href="#">NM_007960</a> | <a href="#">Etv1</a>          |
| 1.70          | <a href="#">AK014360</a>  | <a href="#">Krt1-10</a>       | 1.52          | <a href="#">NM_009369</a> | <a href="#">Tgfb1</a>         |
| 1.70          | <a href="#">BB119177</a>  |                               | 1.51          | <a href="#">AW912417</a>  | <a href="#">4930488E11Rik</a> |
| 1.69          | <a href="#">NM_008733</a> | <a href="#">Nrap</a>          | 1.51          | <a href="#">NM_009856</a> | <a href="#">Cd83</a>          |
|               |                           |                               | 1.51          | <a href="#">NM_133242</a> | <a href="#">Rnpc2</a>         |
|               |                           |                               | 1.51          | <a href="#">AV297961</a>  | <a href="#">5730453H04Rik</a> |
|               |                           |                               | 1.51          | <a href="#">C77757</a>    | <a href="#">Psm3</a>          |
|               |                           |                               | 1.50          | <a href="#">AK009847</a>  | <a href="#">2310046G15Rik</a> |
|               |                           |                               | 1.50          | <a href="#">BG069460</a>  | <a href="#">Rbpms</a>         |
