# Supplementary material
Source: PubMed Central journal article supplement (PMC7457145)
Supplement: NIHMS1611696-supplement-Supplemental_table_4.pdf [file NIHMS1611696-supplement-Supplemental_table_4.pdf]

Supplement Table 4. Differentially down-regulated genes (>1.5-fold differences; P < 0.05) from mammary tumors of the PyMT transgenic mice exposed to zebularine for 23 days.

| Zeb1/C1 Ratio | GB Accession              | GeneCards                     | Zeb1/C1 Ratio | GB Accession              | GeneCards                     |
|---------------|---------------------------|-------------------------------|---------------|---------------------------|-------------------------------|
| 0.14          | <a href="#">NM_007785</a> | <a href="#">Csng</a>          | 0.61          | <a href="#">BQ178166</a>  | <a href="#">6230409E13Rik</a> |
| 0.25          | <a href="#">AI181686</a>  | <a href="#">Tbca</a>          | 0.61          | <a href="#">NM_007807</a> | <a href="#">Cybb</a>          |
| 0.29          | <a href="#">AI462635</a>  | <a href="#">Aldh2</a>         | 0.62          | <a href="#">AA275278</a>  | <a href="#">Phf6</a>          |
| 0.33          | <a href="#">AV045081</a>  | <a href="#">Spaca3</a>        | 0.62          | <a href="#">NM_009127</a> | <a href="#">Scd1</a>          |
| 0.34          | <a href="#">BB615512</a>  |                               | 0.62          | <a href="#">AI448995</a>  | <a href="#">2810402A17Rik</a> |
| 0.34          | <a href="#">NM_007784</a> | <a href="#">Csna</a>          | 0.62          | <a href="#">BE291723</a>  |                               |
| 0.41          | <a href="#">BB255841</a>  |                               | 0.62          | <a href="#">BG065248</a>  | <a href="#">D12Ert604e</a>    |
| 0.42          | <a href="#">NM_134051</a> | <a href="#">Igh-VJ558</a>     | 0.62          | <a href="#">BG145492</a>  | <a href="#">1300006N24Rik</a> |
| 0.43          | <a href="#">C86506</a>    | <a href="#">Slc35a5</a>       | 0.63          | <a href="#">BE984574</a>  | <a href="#">B130008E12Rik</a> |
| 0.44          | <a href="#">BB207248</a>  | <a href="#">Pik3cd</a>        | 0.63          | <a href="#">AI851834</a>  | <a href="#">Zap3</a>          |
| 0.45          | <a href="#">BC006835</a>  | <a href="#">BC006835</a>      | 0.63          | <a href="#">BB652005</a>  | <a href="#">D8Ert69e</a>      |
| 0.46          | <a href="#">C77112</a>    |                               | 0.63          | <a href="#">BG066227</a>  |                               |
| 0.46          | <a href="#">BB476297</a>  |                               | 0.63          | <a href="#">BB144704</a>  | <a href="#">Abca1</a>         |
| 0.47          | <a href="#">BC019135</a>  | <a href="#">Mmp12</a>         | 0.63          | <a href="#">BB825830</a>  | <a href="#">4833408C14Rik</a> |
| 0.47          | <a href="#">BI453502</a>  | <a href="#">AI315068</a>      | 0.63          | <a href="#">BQ175889</a>  | <a href="#">Crsp2</a>         |
| 0.48          | <a href="#">BC022776</a>  |                               | 0.63          | <a href="#">BB503322</a>  |                               |
| 0.48          | <a href="#">AF165166</a>  | <a href="#">Prnd</a>          | 0.63          | <a href="#">BB154198</a>  | <a href="#">A130019P10Rik</a> |
| 0.48          | <a href="#">AV047570</a>  | <a href="#">Calm3</a>         | 0.63          | <a href="#">BB147678</a>  | <a href="#">Duox2</a>         |
| 0.51          | <a href="#">BB428868</a>  | <a href="#">Dock4</a>         | 0.64          | <a href="#">BB211667</a>  | <a href="#">2810013C04Rik</a> |
| 0.51          | <a href="#">BB144704</a>  | <a href="#">Abca1</a>         | 0.64          | <a href="#">AF031035</a>  | <a href="#">Stc2</a>          |
| 0.51          | <a href="#">AV061337</a>  | <a href="#">Smbp</a>          | 0.64          | <a href="#">BB623994</a>  |                               |
| 0.51          | <a href="#">AY091600</a>  | <a href="#">Setdb1</a>        | 0.64          | <a href="#">BM209124</a>  |                               |
| 0.53          | <a href="#">BB148128</a>  | <a href="#">Ccr2</a>          | 0.64          | <a href="#">BB524771</a>  |                               |
| 0.53          | <a href="#">BB193643</a>  | <a href="#">Car7</a>          | 0.64          | <a href="#">BB291769</a>  | <a href="#">Cog8</a>          |
| 0.54          | <a href="#">NM_138310</a> | <a href="#">Apob48r</a>       | 0.64          | <a href="#">BE945978</a>  | <a href="#">1700007P14Rik</a> |
| 0.54          | <a href="#">NM_024459</a> | <a href="#">Ppp3r1</a>        | 0.64          | <a href="#">BG916492</a>  | <a href="#">Eli3</a>          |
| 0.54          | <a href="#">AV218922</a>  | <a href="#">2610002J02Rik</a> | 0.65          | <a href="#">BB269715</a>  | <a href="#">Hif1a</a>         |
| 0.55          | <a href="#">AK016125</a>  | <a href="#">Boll</a>          | 0.65          | <a href="#">AW536705</a>  | <a href="#">Supt16h</a>       |
| 0.55          | <a href="#">NM_008569</a> | <a href="#">Anapc1</a>        | 0.65          | <a href="#">AV244484</a>  | <a href="#">8430417G17Rik</a> |
| 0.56          | <a href="#">BB357579</a>  | <a href="#">Sliitrk4</a>      | 0.65          | <a href="#">BC026374</a>  | <a href="#">BC026374</a>      |
| 0.56          | <a href="#">BB831617</a>  | <a href="#">BC004701</a>      | 0.65          | <a href="#">AK004821</a>  | <a href="#">Pvrl4</a>         |
| 0.56          | <a href="#">BB380493</a>  |                               | 0.65          | <a href="#">NM_008090</a> | <a href="#">Gata2</a>         |
| 0.56          | <a href="#">BF011349</a>  | <a href="#">Gas2</a>          | 0.65          | <a href="#">AW545934</a>  | <a href="#">Ttf1</a>          |
| 0.56          | <a href="#">NM_011823</a> | <a href="#">Gpr34</a>         | 0.65          | <a href="#">D00622</a>    | <a href="#">Lrpap1</a>        |
| 0.56          | <a href="#">NM_013483</a> | <a href="#">Btn1a1</a>        | 0.65          | <a href="#">AK010162</a>  | <a href="#">Rnf14</a>         |
| 0.57          | <a href="#">BM217816</a>  | <a href="#">Braf</a>          | 0.65          | <a href="#">BB217568</a>  | <a href="#">Otop1</a>         |
| 0.57          | <a href="#">BC019948</a>  | <a href="#">5430405G24Rik</a> | 0.65          | <a href="#">BG075210</a>  | <a href="#">Ss18l1</a>        |
| 0.58          | <a href="#">NM_133798</a> | <a href="#">C85658</a>        | 0.65          | <a href="#">NM_008116</a> | <a href="#">Ggt1</a>          |
| 0.58          | <a href="#">BB363453</a>  | <a href="#">2810403B08Rik</a> | 0.65          | <a href="#">NM_008173</a> | <a href="#">Nr3c1</a>         |
| 0.58          | <a href="#">BI654068</a>  | <a href="#">Vps35</a>         | 0.65          | <a href="#">NM_008402</a> | <a href="#">Itgav</a>         |
| 0.59          | <a href="#">AK005123</a>  | <a href="#">1500002M01Rik</a> | 0.66          | <a href="#">AJ005074</a>  | <a href="#">Pdcd6ip</a>       |
| 0.59          | <a href="#">BB667784</a>  | <a href="#">1110059H15Rik</a> | 0.66          | <a href="#">BB811124</a>  | <a href="#">2810410P22Rik</a> |
| 0.59          | <a href="#">NM_007815</a> | <a href="#">Cyp2c29</a>       | 0.66          | <a href="#">AK017105</a>  | <a href="#">4933438A12Rik</a> |
| 0.59          | <a href="#">AI426175</a>  | <a href="#">AW049829</a>      | 0.66          | <a href="#">BQ031259</a>  | <a href="#">C79267</a>        |
| 0.59          | <a href="#">AI154956</a>  |                               | 0.66          | <a href="#">BB140799</a>  | <a href="#">Crsp2</a>         |
| 0.60          | <a href="#">BI106967</a>  | <a href="#">2600011C06Rik</a> | 0.66          | <a href="#">AK018446</a>  | <a href="#">8430427H17Rik</a> |
| 0.60          | <a href="#">BB183559</a>  | <a href="#">Hdac11</a>        | 0.66          | <a href="#">AA867818</a>  | <a href="#">4833445I07Rik</a> |
| 0.60          | <a href="#">BQ175876</a>  | <a href="#">R75022</a>        | 0.66          | <a href="#">BE533039</a>  | <a href="#">Stch</a>          |
| 0.60          | <a href="#">AI851474</a>  | <a href="#">A830093I24Rik</a> | 0.66          | <a href="#">AI551821</a>  | <a href="#">C230004D03Rik</a> |
| 0.60          | <a href="#">BM232562</a>  | <a href="#">Fem1b</a>         | 0.66          | <a href="#">BG069262</a>  | <a href="#">AU018552</a>      |
| 0.60          | <a href="#">BB706548</a>  | <a href="#">Epha4</a>         | 0.66          | <a href="#">NM_015765</a> | <a href="#">Hspa14</a>        |
| 0.60          | <a href="#">AV338037</a>  |                               | 0.66          | <a href="#">U52193</a>    | <a href="#">Pik3c2a</a>       |
| 0.61          | <a href="#">AV271088</a>  | <a href="#">1700028P05Rik</a> | 0.66          | <a href="#">NM_007546</a> | <a href="#">Bikl</a>          |
| 0.61          | <a href="#">NM_133715</a> | <a href="#">2310069I04Rik</a> | 0.66          | <a href="#">C77735</a>    | <a href="#">D5Ert66e</a>      |
| 0.61          | <a href="#">AA215024</a>  | <a href="#">Xpr1</a>          | 0.66          | <a href="#">BG070878</a>  | <a href="#">D2Ert485e</a>     |
| 0.61          | <a href="#">NM_053096</a> | <a href="#">Cml2</a>          | 0.66          | <a href="#">BE981338</a>  | <a href="#">Gpiap1</a>        |
| 0.61          | <a href="#">NM_013499</a> | <a href="#">Crry</a>          | 0.66          | <a href="#">NM_013869</a> | <a href="#">Tnfrsf19</a>      |
| 0.61          | <a href="#">X57349_3</a>  | <a href="#">Tfrc</a>          | 0.66          | <a href="#">NM_011926</a> | <a href="#">Ceacam1</a>       |
| 0.61          | <a href="#">BE989096</a>  | <a href="#">Ahr</a>           | 0.67          | <a href="#">BC021497</a>  | <a href="#">5730444A13Rik</a> |
|               |                           |                               | 0.67          | <a href="#">BC018179</a>  | <a href="#">Usp1</a>          |
