# Supplementary material
Source: PubMed Central journal article supplement (PMC7457145)
Supplement: NIHMS1611696-supplement-Supplemental_table_5.pdf [file NIHMS1611696-supplement-Supplemental_table_5.pdf]

Supplement Table 5. Differentially up-regulated genes (>1.5-fold differences; P < 0.05) from mammary tumors of the PyMT transgenic mice exposed to zebularine for 48 days.

| Zeb1/C1 Ratio | GB Accession | GeneCards     | Zeb1/C1 Ratio | GB Accession | GeneCards     | Zeb1/C1 Ratio | GB Accession | GeneCards     |
|---------------|--------------|---------------|---------------|--------------|---------------|---------------|--------------|---------------|
| 5114          | BC010754     | Klk6          | 2.36          | NM_023456    | Npy           | 1.64          | BC023060     | Efemp1        |
| 2683          | BC010754     | Klk6          | 2.33          | BC026584     | Adhfe1        | 1.64          | AI561743     | BC004004      |
| 1022          | NM_009268    | Spt2          | 2.31          | AV349563     | Adra2c        | 1.64          | AV218841     | Nnat          |
| 724           | BC011134     | 2200003E03Rik | 2.28          | AK007822     | Fthfd         | 1.64          | AW493518     | BC064078      |
| 517           | NM_021405    | Cst10         | 2.27          | BF714880     | Rnase1        | 1.63          | NM_008344    | Igfbp6        |
| 457           | NM_011422    | Smr1          | 2.23          | AV100225     | Tmem4         | 1.63          | BQ174458     | Khsrp         |
| 408           | AV053098     | Klk6          | 2.17          | AB061305     | Siat4c        | 1.63          | AK003388     | 1110003O08Rik |
| 328           | NM_009267    | Spt1          | 2.17          | NM_008992    | Abcd4         | 1.63          | BC025567     | 2210010N04Rik |
| 267           | BC010288     | Psp           | 2.15          | AV371704     | 9030418M05Rik | 1.63          | BI412259     | E130112L23Rik |
| 257           | NM_007446    | Amy1          | 2.15          | BC022752     | Slc37a2       | 1.63          | BC005747     | Papln         |
| 247           | AK009287     | 2310010P21Rik | 2.13          | NM_018827    | Crlf1         | 1.61          | NM_010741    | Ly6c          |
| 182           | NM_008644    | Muc10         | 2.12          | AV337975     | 2810022L02Rik | 1.61          | BB322737     | B930041F14Rik |
| 141           | BC021401     | Muc10         | 2.11          | BE852308     |               | 1.60          | BM118245     | Syt1          |
| 115           | NM_009639    | Crisp1        | 2.09          | NM_008183    | Gstm2         | 1.60          | BG076338     | Fbxo21        |
| 99            | BC014718     | Dnase1        | 1.99          | AW490245     | Nfic          | 1.60          | AV369681     | Slc39a3       |
| 76            | M17962       | Klk9          | 1.99          | AF358459     | E130112L23Rik | 1.59          | AK003780     | Tns           |
| 52            | NM_008456    | Klk6          | 1.96          | BI412259     | Igh-6         | 1.59          | AW493494     | 5330435L01Rik |
| 33            | NM_052823    | Fxyd2         | 1.92          | AI326478     | Al851523      | 1.58          | NM_008358    | Il15ra        |
| 31            | NM_008456    | Klk6          | 1.92          | BE989939     | 2900073F20Rik | 1.58          | AW047508     | 9430097H08Rik |
| 27            | AK017450     | 2310010P21Rik | 1.89          | AW556161     | Myoz1         | 1.57          | NM_018763    | Chst2         |
| 22            | NM_009638    | Crisp1        | 1.88          | NM_021508    | Al851464      | 1.57          | NM_009177    | Siat4a        |
| 20            | NM_010915    | Ngfa          | 1.86          | BC026366     | A830037N07Rik | 1.57          | AV255351     | Lysal1        |
| 15.87         | AV002675     | Fxyd2         | 1.84          | AV337619     | Gstm1         | 1.56          | NM_133214    | BC017612      |
| 14.32         | BC012701     | Ucp1          | 1.83          | NM_010358    | Cog1          | 1.56          | BE197945     | Sdpr          |
| 14.27         | NM_052823    | Fxyd2         | 1.83          | BB210424     | Slc6a6        | 1.56          | AV025667     | Gsn           |
| 13.93         | NM_138684    | Swam2         | 1.80          | NM_009320    | C76872        | 1.55          | BB173900     | Ltbp3         |
| 11.97         | NM_080420    | Lpo           | 1.78          | BG065773     | Pglyrp1       | 1.55          | AK018169     | 3200002M19Rik |
| 9.58          | NM_010644    | Klk26         | 1.78          | NM_009402    | Pim3          | 1.55          | AA204410     | 2410022M11Rik |
| 8.67          | C86550       | Dcpp          | 1.77          | BB206220     | 2810403B08Rik | 1.55          | BI685536     | B4galt6       |
| 7.45          | C86550       | Dcpp          | 1.77          | BB321286     | Serpina1a     | 1.55          | AI326272     | Zipro1        |
| 7.39          | BC013660     | Klk21         | 1.75          | BC012874     | Atp6v0d2      | 1.54          | AJ277212     | Mustrn1       |
| 6.95          | NM_009605    | Acdc          | 1.75          | BB769890     | Kcnj3         | 1.54          | AI647775     | 1620401E04Rik |
| 6.61          | BB144871     | BB144871      | 1.73          | NM_008426    | Fmo1          | 1.54          | Y17709       | Fzd9          |
| 6.28          | AI315015     | Ces3          | 1.73          | BC011229     | 4833413E03Rik | 1.54          | BB764137     | Tll1          |
| 6.09          | AB039276     | Klk6          | 1.71          | AK019514     | Slc9a3r2      | 1.54          | NM_026435    | 1810045K17Rik |
| 5.18          | NM_007817    | Cyp2f2        | 1.71          | BG073393     |               | 1.53          | BC006640     | Cxcl12        |
| 4.18          | BC018264     | Pip           | 1.70          | NM_010358    | Gstm1         | 1.53          | BC019664     | 2310016C16Rik |
| 3.94          | NM_011224    | Pygm          | 1.70          | BC011209     | BC011209      | 1.53          | AV025559     | Gsn           |
| 3.91          | BB762731     | Gpr155        | 1.70          | AW536289     | AW536289      | 1.53          | AK015859     | 4930521C21Rik |
| 3.84          | NM_009802    | Car6          | 1.70          | AJ132394     | Rorc          | 1.52          | BB303582     | AI452195      |
| 3.42          | NM_053200    | Ces3          | 1.69          | BB806780     | Rusc1         | 1.52          | NM_133735    | Ptcd1         |
| 3.32          | AI647687     | Dpep1         | 1.69          | AK004794     | Mamdc2        | 1.52          | NM_023605    | Fbxo9         |
| 3.12          | AV312182     |               | 1.68          | AV064339     | Sdpr          | 1.51          | AK007348     | 1810063P04Rik |
| 2.96          | NM_010643    | Klk21         | 1.68          | AV064339     | Dorz1         | 1.51          | BF018302     | AI463170      |
| 2.87          | AV325919     | Atp1a2        | 1.68          | BC006879     | 2010001M06Rik | 1.51          | BE952586     |               |
| 2.81          | NM_011921    | Aldh1a7       | 1.68          | BE200030     | Sfrp1         | 1.51          | AW741316     | Nrg2          |
| 2.81          | NM_007606    | Car3          | 1.67          | BI658627     | Khk           | 1.51          | AW049955     | Stim1         |
| 2.80          | NM_009943    | Cox6a2        | 1.67          | BC013464     | B430104H02Rik | 1.50          | NM_009287    | Nphp1         |
| 2.71          | AK012903     | 2810046C01Rik | 1.67          | AK002291     | Tpm2          | 1.50          | AK009252     | Idi1          |
| 2.64          | AK017272     | Lpl           | 1.67          | BC024358     | B4galt6       | 1.50          | BC004801     | Lrfn3         |
| 2.55          | BC013477     | Adh1          | 1.67          | BG066773     | AI173486      | 1.50          | AV062156     |               |
| 2.48          | BC024542     | Oit1          | 1.65          | BB106834     | Pygl          | 1.50          |              |               |
| 2.39          | NM_007855    | Twist2        | 1.65          | NM_133198    | Cxcl12        | 1.50          |              |               |
|               |              |               | 1.65          | NM_013655    | 9030425E11Rik | 1.50          |              |               |
|               |              |               | 1.64          | BG072972     | AW050198      | 1.50          |              |               |
|               |              |               |               | BE987157     |               | 1.50          |              |               |
