# Supplementary material
Source: PubMed Central journal article supplement (PMC7457145)
Supplement: NIHMS1611696-supplement-Supplemental_table_6.pdf [file NIHMS1611696-supplement-Supplemental_table_6.pdf]

Supplement Table 6. Differentially down-regulated genes (>1.5-fold differences; P < 0.05) from mammary tumors of the PyMT transgenic mice exposed to zebularine for 48 days.

| Zeb1/C1 Ratio | GB Accession              | GeneCards                     | Zeb1/C1 Ratio | GB Accession              | GeneCards                     |
|---------------|---------------------------|-------------------------------|---------------|---------------------------|-------------------------------|
| 0.24          | <a href="#">BB818398</a>  | <a href="#">2610007K22Rik</a> | 0.60          | <a href="#">NM_031188</a> | <a href="#">Mup1</a>          |
| 0.28          | <a href="#">NM_008607</a> | <a href="#">Mmp13</a>         | 0.60          | <a href="#">BM245060</a>  | <a href="#">4930431H11Rik</a> |
| 0.30          | <a href="#">BE852312</a>  | <a href="#">1700001C14Rik</a> | 0.60          | <a href="#">AV359819</a>  | <a href="#">Jag1</a>          |
| 0.31          | <a href="#">BC004048</a>  | <a href="#">Wif1</a>          | 0.60          | <a href="#">AV018723</a>  | <a href="#">H2-Aa</a>         |
| 0.37          | <a href="#">AK013376</a>  | <a href="#">Aplp2</a>         | 0.60          | <a href="#">BB202300</a>  |                               |
| 0.37          | <a href="#">AF215668</a>  | <a href="#">Rgs2</a>          | 0.61          | <a href="#">AY047360</a>  | <a href="#">1700001C14Rik</a> |
| 0.39          | <a href="#">BG065230</a>  | <a href="#">Robo1</a>         | 0.61          | <a href="#">AI851787</a>  | <a href="#">Chd1</a>          |
| 0.40          | <a href="#">AF363030</a>  | <a href="#">Ogt</a>           | 0.61          | <a href="#">NM_133931</a> | <a href="#">Pot1</a>          |
| 0.42          | <a href="#">AV301313</a>  | <a href="#">Papd4</a>         | 0.61          | <a href="#">BB174749</a>  | <a href="#">2010109K11Rik</a> |
| 0.42          | <a href="#">AV328325</a>  |                               | 0.61          | <a href="#">AI481328</a>  | <a href="#">Mgat2</a>         |
| 0.45          | <a href="#">AF215668</a>  | <a href="#">Rgs2</a>          | 0.61          | <a href="#">BC003241</a>  | <a href="#">Cstf3</a>         |
| 0.46          | <a href="#">AK017670</a>  | <a href="#">5730456K23Rik</a> | 0.62          | <a href="#">BB796313</a>  | <a href="#">3000004N20Rik</a> |
| 0.34          | <a href="#">NM_007784</a> | <a href="#">Csna</a>          | 0.62          | <a href="#">AV271979</a>  | <a href="#">Lats2</a>         |
| 0.47          | <a href="#">BB326079</a>  | <a href="#">B430203I24Rik</a> | 0.62          | <a href="#">AK020197</a>  | <a href="#">8030431D03Rik</a> |
| 0.47          | <a href="#">NM_030750</a> | <a href="#">Sgpp1</a>         | 0.62          | <a href="#">BM222148</a>  |                               |
| 0.47          | <a href="#">BF731393</a>  |                               | 0.62          | <a href="#">BB277461</a>  | <a href="#">Slc1a4</a>        |
| 0.48          | <a href="#">BB241324</a>  | <a href="#">Smad7</a>         | 0.62          | <a href="#">AI790362</a>  | <a href="#">Atp6v1b2</a>      |
| 0.50          | <a href="#">BB369191</a>  | <a href="#">D0H4S114</a>      | 0.62          | <a href="#">M14216</a>    | <a href="#">Fcgr2b</a>        |
| 0.51          | <a href="#">BB204151</a>  |                               | 0.62          | <a href="#">BM238032</a>  | <a href="#">Ucp2</a>          |
| 0.53          | <a href="#">BF018182</a>  | <a href="#">C330005L02Rik</a> | 0.62          | <a href="#">BC014857</a>  | <a href="#">Sfrs7</a>         |
| 0.54          | <a href="#">AV303002</a>  | <a href="#">Nupl1</a>         | 0.62          | <a href="#">NM_016707</a> | <a href="#">Bcl11a</a>        |
| 0.54          | <a href="#">AV213552</a>  | <a href="#">Taf7</a>          | 0.62          | <a href="#">BC006030</a>  | <a href="#">9330147J08Rik</a> |
| 0.54          | <a href="#">AV299215</a>  | <a href="#">C430048L16Rik</a> | 0.63          | <a href="#">AV066554</a>  | <a href="#">Snrpb2</a>        |
| 0.54          | <a href="#">NM_026228</a> | <a href="#">Slc39a8</a>       | 0.63          | <a href="#">BB369212</a>  | <a href="#">C130047D21Rik</a> |
| 0.54          | <a href="#">AK017269</a>  | <a href="#">4933428A15Rik</a> | 0.63          | <a href="#">AV120130</a>  | <a href="#">Nradd</a>         |
| 0.55          | <a href="#">AW107303</a>  | <a href="#">Usp9x</a>         | 0.63          | <a href="#">BC023498</a>  | <a href="#">Slc39a4</a>       |
| 0.55          | <a href="#">BM218981</a>  | <a href="#">Phip</a>          | 0.63          | <a href="#">BG968903</a>  | <a href="#">Ywhaz</a>         |
| 0.55          | <a href="#">BB520952</a>  |                               | 0.63          | <a href="#">BM244144</a>  |                               |
| 0.55          | <a href="#">BE652553</a>  | <a href="#">D4Wsu53e</a>      | 0.63          | <a href="#">AW456056</a>  | <a href="#">B930096F20Rik</a> |
| 0.56          | <a href="#">BE691716</a>  |                               | 0.63          | <a href="#">BB344827</a>  | <a href="#">Prpf4b</a>        |
| 0.56          | <a href="#">BB072896</a>  | <a href="#">Tm4sf12</a>       | 0.63          | <a href="#">BG070110</a>  |                               |
| 0.56          | <a href="#">NM_033572</a> | <a href="#">Wbscr16</a>       | 0.63          | <a href="#">NM_019467</a> | <a href="#">Aif1</a>          |
| 0.56          | <a href="#">C87112</a>    | <a href="#">1700025B16Rik</a> | 0.64          | <a href="#">BC018188</a>  | <a href="#">1200009B18Rik</a> |
| 0.57          | <a href="#">BB713457</a>  | <a href="#">Lsm11</a>         | 0.64          | <a href="#">BB283590</a>  | <a href="#">Zfx</a>           |
| 0.57          | <a href="#">BG976607</a>  |                               | 0.64          | <a href="#">BI076483</a>  |                               |
| 0.57          | <a href="#">BI732921</a>  | <a href="#">LOC380969</a>     | 0.64          | <a href="#">BF146301</a>  | <a href="#">Rpl13a</a>        |
| 0.57          | <a href="#">BE198251</a>  | <a href="#">3110050N22Rik</a> | 0.64          | <a href="#">BB079339</a>  |                               |
| 0.57          | <a href="#">BB495464</a>  | <a href="#">AI662729</a>      | 0.65          | <a href="#">NM_133358</a> | <a href="#">Zfp617</a>        |
| 0.57          | <a href="#">BB129409</a>  | <a href="#">Slc6a15</a>       | 0.65          | <a href="#">AI505360</a>  |                               |
| 0.57          | <a href="#">BB279279</a>  |                               | 0.65          | <a href="#">NM_024438</a> | <a href="#">Dusp19</a>        |
| 0.58          | <a href="#">BB115446</a>  | <a href="#">AV025504</a>      | 0.65          | <a href="#">NM_024438</a> |                               |
| 0.58          | <a href="#">BB387783</a>  | <a href="#">A230046K03Rik</a> | 0.65          | <a href="#">BG976607</a>  |                               |
| 0.58          | <a href="#">BB442784</a>  |                               | 0.65          | <a href="#">BM936291</a>  | <a href="#">2310047C04Rik</a> |
| 0.58          | <a href="#">BB358264</a>  | <a href="#">C030027H14Rik</a> | 0.65          | <a href="#">NM_019656</a> | <a href="#">Tm4sf6</a>        |
| 0.58          | <a href="#">BB036856</a>  | <a href="#">4932409F11Rik</a> | 0.66          | <a href="#">NM_013706</a> | <a href="#">Cd52</a>          |
| 0.58          | <a href="#">BB139169</a>  | <a href="#">AA407452</a>      | 0.66          | <a href="#">BB408277</a>  | <a href="#">AI448003</a>      |
| 0.59          | <a href="#">BG796845</a>  | <a href="#">Ssb</a>           | 0.66          | <a href="#">AW547438</a>  | <a href="#">LOC240469</a>     |
| 0.59          | <a href="#">BE690613</a>  | <a href="#">Ucp2</a>          | 0.66          | <a href="#">U20619</a>    | <a href="#">Kpna1</a>         |
| 0.59          | <a href="#">AW556821</a>  | <a href="#">2610018G03Rik</a> | 0.66          | <a href="#">AK009276</a>  | <a href="#">Ube2d3</a>        |
| 0.59          | <a href="#">AK018386</a>  | <a href="#">8430406H22Rik</a> | 0.66          | <a href="#">AI593198</a>  |                               |
|               |                           |                               | 0.66          | <a href="#">NM_025331</a> | <a href="#">Gng11</a>         |
|               |                           |                               | 0.66          | <a href="#">AV276001</a>  | <a href="#">BC062958</a>      |
|               |                           |                               | 0.66          | <a href="#">AV219419</a>  | <a href="#">Sept7</a>         |
|               |                           |                               | 0.66          | <a href="#">BB208426</a>  | <a href="#">A430088C08Rik</a> |
|               |                           |                               | 0.66          | <a href="#">BB307279</a>  | <a href="#">B230213L16Rik</a> |
|               |                           |                               | 0.66          | <a href="#">BG805795</a>  |                               |
|               |                           |                               | 0.66          | <a href="#">NM_133232</a> | <a href="#">Pfkfb3</a>        |
|               |                           |                               | 0.66          | <a href="#">AI931937</a>  | <a href="#">3010019O03Rik</a> |
|               |                           |                               | 0.66          | <a href="#">BB270852</a>  |                               |
|               |                           |                               | 0.67          | <a href="#">BB025078</a>  | <a href="#">4932442K20Rik</a> |
