# Supplementary material
Source: PubMed Central journal article supplement (PMC7457145)
Supplement: NIHMS1611696-supplement-Supplemental_table_7.pdf [file NIHMS1611696-supplement-Supplemental_table_7.pdf]

**Supplemental Table 7. Expression level of tumor suppressors in different tissues measured by real-time RT-PCR**

| Gene name | Mouse #        | Relative gene expression in tissue |                |                       |                       |                         |                         |
|-----------|----------------|------------------------------------|----------------|-----------------------|-----------------------|-------------------------|-------------------------|
|           |                | Normal Gland 2&3                   | Normal Gland 4 | Tumor (23D untreated) | Tumor (48D untreated) | Tumor (23D Zeb treated) | Tumor (48D Zeb treated) |
| Sfrp1     | #1             | 1.886                              | 1.000          | 0.053                 | 0.143                 | 6.437                   |                         |
|           | #2             | 0.161                              | 0.055          | 0.107                 | 0.121                 | 0.570                   |                         |
|           | #3             | 9.341                              | 0.521          | 0.058                 | 0.124                 | 0.201                   |                         |
|           | <b>Average</b> | <b>3.796</b>                       | <b>0.525</b>   | <b>0.073</b>          | <b>0.129</b>          | <b>2.402</b>            |                         |
| Twist2    | #1             | 1.031                              | 1.000          | 0.002                 | 0.002                 | 0.001                   | 0.109                   |
|           | #2             | 0.051                              | 0.016          | 0.005                 | 0.006                 | 0.006                   | 0.004                   |
|           | #3             | 1.927                              | 0.194          | 0.003                 | 0.002                 | 0.005                   | 0.002                   |
|           | <b>Average</b> | <b>1.003</b>                       | <b>0.403</b>   | <b>0.003</b>          | <b>0.003</b>          | <b>0.004</b>            | <b>0.038</b>            |
| Becn1     | #1             | 0.574                              | 1.000          | 0.038                 | 0.064                 | 0.089                   |                         |
|           | #2             | 0.073                              | 0.015          | 0.096                 | 0.087                 | 0.120                   |                         |
|           | #3             | 2.810                              | 0.091          | 0.037                 | 0.055                 | 0.170                   |                         |
|           | <b>Average</b> | <b>1.152</b>                       | <b>0.369</b>   | <b>0.057</b>          | <b>0.069</b>          | <b>0.126</b>            |                         |
| Cdkn1a    | #1             | 0.710                              | 1.000          | 0.040                 |                       | 0.090                   |                         |
|           | #2             | 7.180                              | 0.180          | 0.130                 |                       | 0.110                   |                         |
|           | #3             | 0.130                              | 0.220          | 0.060                 |                       | 0.080                   |                         |
|           | <b>Average</b> | <b>2.673</b>                       | <b>0.467</b>   | <b>0.077</b>          |                       | <b>0.093</b>            |                         |
| H19       | #1             | 2.450                              | 1.000          | 0.060                 |                       | 0.080                   |                         |
|           | #2             | 2.240                              | 0.090          | 0.140                 |                       | 0.110                   |                         |
|           | #3             | 1.460                              | 0.100          | 0.040                 |                       | 0.100                   |                         |
|           | <b>Average</b> | <b>2.050</b>                       | <b>0.397</b>   | <b>0.080</b>          |                       | <b>0.097</b>            |                         |
